# Supplementary material for: Identification of Novel Hub Genes Associated with Psoriasis Using Integrated Bioinformatics Analysis
Source: MDPI journal article supplement (doi:10.3390/ijms232315286), 2022-12-04
Supplement: s1 [file s1]

**Supplementary Table S1.** GO and KEGG enrichment analysis of dataset GSE166388.

| -    | ID         | Description                                 | GeneRatio | BgRatio   | <i>p</i> value | <i>p.adjust</i> | <i>q</i> value |
|------|------------|---------------------------------------------|-----------|-----------|----------------|-----------------|----------------|
| BP   | GO:0048562 | embryonic organ morphogenesis               | 47/1017   | 288/18670 | 1.30e-11       | 3.90e-08        | 3.55e-08       |
| BP   | GO:0048568 | embryonic organ development                 | 60/1017   | 428/18670 | 1.49e-11       | 3.90e-08        | 3.55e-08       |
| BP   | GO:0048705 | skeletal system morphogenesis               | 41/1017   | 239/18670 | 5.42e-11       | 9.47e-08        | 8.62e-08       |
| CC   | GO:0062023 | collagen-containing extracellular matrix    | 57/1068   | 406/19717 | 3.81e-11       | 2.22e-08        | 2.04e-08       |
| CC   | GO:0000793 | condensed chromosome                        | 34/1068   | 223/19717 | 4.48e-08       | 1.30e-05        | 1.20e-05       |
| CC   | GO:0098687 | chromosomal region                          | 43/1068   | 349/19717 | 4.24e-07       | 8.23e-05        | 7.57e-05       |
| MF   | GO:0005201 | extracellular matrix structural constituent | 26/999    | 163/17697 | 1.49e-06       | 0.001           | 0.001          |
| MF   | GO:0003678 | DNA helicase activity                       | 16/999    | 81/17697  | 9.87e-06       | 0.004           | 0.004          |
| MF   | GO:0003697 | single-stranded DNA binding                 | 19/999    | 113/17697 | 1.74e-05       | 0.005           | 0.005          |
| KEGG | hsa04270   | Vascular smooth muscle contraction          | 20/426    | 135/8076  | 2.41e-05       | 0.007           | 0.006          |
| KEGG | hsa04310   | Wnt signaling pathway                       | 19/426    | 160/8076  | 7.29e-04       | 0.073           | 0.067          |
| KEGG | hsa04510   | Focal adhesion                              | 22/426    | 201/8076  | 8.79e-04       | 0.073           | 0.067          |

**Supplementary Table S2.** Data enrichment analysis using GO and KEGG GSE50790.

| ONTOLOGY | ID         | Description                             | GeneRatio | BgRatio   | pvalue   | <i>p.adjust</i> | qvalue   |
|----------|------------|-----------------------------------------|-----------|-----------|----------|-----------------|----------|
| BP       | GO:0070125 | mitochondrial translational elongation  | 27/711    | 88/18670  | 1.10e-17 | 3.64e-14        | 3.43e-14 |
| BP       | GO:0070126 | mitochondrial translational termination | 27/711    | 89/18670  | 1.53e-17 | 3.64e-14        | 3.43e-14 |
| BP       | GO:0006415 | translational termination               | 27/711    | 104/18670 | 1.20e-15 | 1.91e-12        | 1.80e-12 |
| CC       | GO:0000313 | organellar ribosome                     | 24/733    | 87/19717  | 6.29e-15 | 1.79e-12        | 1.67e-12 |
| CC       | GO:0005761 | mitochondrial ribosome                  | 24/733    | 87/19717  | 6.29e-15 | 1.79e-12        | 1.67e-12 |
| CC       | GO:0098798 | mitochondrial protein complex           | 38/733    | 262/19717 | 6.28e-13 | 1.19e-10        | 1.11e-10 |
| MF       | GO:0003735 | structural constituent of ribosome      | 27/689    | 202/17697 | 2.21e-08 | 1.78e-05        | 1.74e-05 |
| MF       | GO:0004298 | threonine-type endopeptidase activity   | 6/689     | 21/17697  | 1.12e-04 | 0.030           | 0.029    |
| MF       | GO:0070003 | threonine-type peptidase activity       | 6/689     | 21/17697  | 1.12e-04 | 0.030           | 0.029    |
| KEGG     | hsa03010   | Ribosome                                | 18/341    | 158/8076  | 1.13e-04 | 0.033           | 0.031    |
| KEGG     | hsa04932   | Non-alcoholic fatty liver disease       | 16/341    | 150/8076  | 5.67e-04 | 0.083           | 0.077    |
| KEGG     | hsa05010   | Alzheimer disease                       | 29/341    | 369/8076  | 8.71e-04 | 0.085           | 0.079    |

**Supplementary Table S3.** GO and KEGG enrichment analysis of dataset GSE42632.

| ONTOLOGY | ID         | Description                                                   | GeneRatio | BgRatio   | pvalue   | <i>p.adjust</i> | qvalue   |
|----------|------------|---------------------------------------------------------------|-----------|-----------|----------|-----------------|----------|
| BP       | GO:0042110 | T cell activation                                             | 35/544    | 464/18670 | 3.06e-07 | 5.26e-04        | 4.58e-04 |
| BP       | GO:1903039 | positive regulation of leukocyte cell-cell adhesion           | 22/544    | 218/18670 | 4.44e-07 | 5.26e-04        | 4.58e-04 |
| BP       | GO:0032496 | response to lipopolysaccharide                                | 28/544    | 330/18670 | 4.68e-07 | 5.26e-04        | 4.58e-04 |
| CC       | GO:0009897 | external side of plasma membrane                              | 29/566    | 393/19717 | 3.73e-06 | 0.002           | 0.002    |
| CC       | GO:0098978 | glutamatergic synapse                                         | 26/566    | 349/19717 | 9.98e-06 | 0.002           | 0.002    |
| CC       | GO:0099240 | intrinsic component of synaptic membrane                      | 15/566    | 164/19717 | 7.96e-05 | 0.012           | 0.011    |
| MF       | GO:0005125 | cytokine activity                                             | 25/541    | 220/17697 | 1.73e-08 | 1.19e-05        | 1.04e-05 |
| MF       | GO:0019955 | cytokine binding                                              | 17/541    | 128/17697 | 3.69e-07 | 1.27e-04        | 1.11e-04 |
| MF       | GO:0008009 | chemokine activity                                            | 10/541    | 49/17697  | 1.84e-06 | 3.76e-04        | 3.28e-04 |
| KEGG     | hsa04060   | Cytokine-cytokine receptor interaction                        | 37/283    | 295/8076  | 8.04e-12 | 2.28e-09        | 2.12e-09 |
| KEGG     | hsa04061   | Viral protein interaction with cytokine and cytokine receptor | 14/283    | 100/8076  | 8.98e-06 | 0.001           | 0.001    |

KEGG      hsa03320      PPAR signaling pathway      12/283      78/8076      1.49e-05      0.001      0.001

**Supplementary Table S4.** Information on 57 genes from the intersection of the three Datasets.

| Numbers | GSE1 GSE2 <br>GSE3 | Full name                                                            | Location                                          | Highest median<br>expression                   | Ensembl<br>gene ID |
|---------|--------------------|----------------------------------------------------------------------|---------------------------------------------------|------------------------------------------------|--------------------|
| 1       | ALDH1A3            | Aldehyde dehydrogenase 1 family member A3                            | hg38<br><a href="#">chr15:100877714-100916626</a> | 63.65 TPM in Prostate                          | ENSG00000184254.16 |
| 2       | AREG               | Amphiregulin                                                         | hg38<br><a href="#">chr4:74445134-74455009</a>    | 53.38 TPM in Adipose-Visceral (Omentum)        | ENSG00000109321.10 |
| 3       | FAM43A             | Family with sequence similarity 43 members A                         | hg38<br><a href="#">chr3:194686544-194689037</a>  | 95.51 TPM in Spleen                            | ENSG00000185112.5  |
| 4       | HOTAIR             | HOX transcript antisense                                             | hg38<br><a href="#">chr12:53962308-53974956</a>   | 27.05 TPM in Artery—Tibial                     | ENSG00000228630.5  |
| 5       | CMAHP              | Cytidine monophospho-N-acetylneuraminic acid hydroxylase, pseudogene | hg38<br><a href="#">chr6:25081320-25166555</a>    | 37.23 TPM in Thyroid                           | ENSG00000168405.15 |
| 6       | AQP9               | Aquaporin 9                                                          | hg38<br><a href="#">chr15:58138169-58185911</a>   | 596.30 TPM in Whole Blood                      | ENSG00000103569.9  |
| 7       | IL-1 $\beta$       | Interleukin 1 beta                                                   | hg38<br><a href="#">chr2:112829751-112836903</a>  | 24.53 TPM in Whole Blood                       | ENSG00000125538.11 |
| 8       | ASPM               | Assembly factor for spindle microtubules                             | hg38<br><a href="#">chr1:197084128-197146694</a>  | 25.05 TPM in Cells-EBV-transformed lymphocytes | ENSG00000066279.17 |
| 9       | FAM111B            | Family with sequence similarity 111 member B                         | hg38<br><a href="#">chr11:59107185-59127410</a>   | 51.31 TPM in Cells-EBV-transformed lymphocytes | ENSG00000189057.10 |
| 10      | HMMR               | Hyaluronan mediated motility receptor                                | hg38<br><a href="#">chr5:163460203-163491945</a>  | 56.76 TPM in Cells-EBV-transformed lymphocytes | ENSG00000072571.19 |
| 11      | CEP55              | Centrosomal protein 55                                               | hg38<br><a href="#">chr10:93496632-93529092</a>   | 54.03 TPM in Cells-EBV-transformed lymphocytes | ENSG00000138180.15 |

|    |          |                                                                  |                                                  |                                                 |                    |
|----|----------|------------------------------------------------------------------|--------------------------------------------------|-------------------------------------------------|--------------------|
| 12 | ESCO2    | Establishment of sister chromatid cohesion N-acetyltransferase 2 | hg38<br><a href="#">chr8:27771949-27812640</a>   | 17.01 TPM in Cells-EBV-transformed lymphocytes  | ENSG00000171320.14 |
| 13 | CYP2J2   | Cytochrome P450 family 2 subfamily J member 2                    | hg38<br><a href="#">chr1:59893308-59926790</a>   | 42.36 TPM in Heart-Atrial Appendage             | ENSG00000134716.9  |
| 14 | MCM10    | Minichromosome maintenance 10 replication initiation factor      | hg38<br><a href="#">chr10:13161554-13211104</a>  | 17.44 TPM in Cells-EBV-transformed lymphocytes  | ENSG00000065328.16 |
| 15 | PBK      | PDZ binding kinase                                               | hg38<br><a href="#">chr8:27809620-27838095</a>   | 81.37 TPM in Testis                             | ENSG00000168078.9  |
| 16 | TOP2A    | DNA topoisomerase II alpha                                       | hg38<br><a href="#">chr17:40388516-40417950</a>  | 150.75 TPM in Cells-EBV-transformed lymphocytes | ENSG00000131747.14 |
| 17 | LIPG     | Lipase G, endothelial type (LIPG)                                | hg38<br><a href="#">chr18:49560699-49599182</a>  | 95.40 TPM in Thyroid                            | ENSG00000101670.11 |
| 18 | TNIP3    | TNFAIP3 interacting protein 3                                    | hg38<br><a href="#">chr4:121131408-121227466</a> | 1.43 TPM in Cells-EBV-transformed lymphocytes   | ENSG00000050730.15 |
| 19 | IFI44    | Interferon induced protein 44                                    | hg38<br><a href="#">chr1:78649796-78664078</a>   | 208.70 TPM in Cells-EBV-transformed lymphocytes | ENSG00000137965.10 |
| 20 | CDKN3    | Cyclin dependent kinase inhibitor 3                              | hg38<br><a href="#">chr14:54396849-54420218</a>  | 176.20 TPM in Testis                            | ENSG00000100526.19 |
| 21 | HELZ2    | Helicase with zinc finger 2                                      | hg38<br><a href="#">chr20:63558086-63574239</a>  | 24.81 TPM in Cells-EBV-transformed lymphocytes  | ENSG00000130589.16 |
| 22 | PCLAF    | PCNA clamp associated factor                                     | hg38<br><a href="#">chr15:64364311-64387687</a>  | 29.71 TPM in Cells-EBV-transformed lymphocytes  | ENSG00000166803.11 |
| 23 | SERPINB3 | Serpin family B member 3                                         | hg38<br><a href="#">chr18:63655197-63661963</a>  | 574.00 TPM in Esophagus-Mucosa                  | ENSG00000057149.15 |
| 24 | GDA      | Guanine deaminase                                                | hg38                                             | 36.99 TPM in                                    | ENSG0000           |

|    |         |                                                  |                                         |                                                 |    |          |            |
|----|---------|--------------------------------------------------|-----------------------------------------|-------------------------------------------------|----|----------|------------|
|    |         |                                                  | <u>chr9:72114595-72257193</u>           | Brain-Frontal Cortex (BA9)                      |    |          | 0119125.16 |
| 25 | GPR68   | G protein-coupled receptor 68                    | hg38<br><u>chr14:91232532-91253925</u>  | 20.72 TPM<br>Pituitary                          | in | ENSG0000 | 0119714.10 |
| 26 | PAPLN   | Papilin, proteoglycan like sulfated glycoprotein | hg38<br><u>chr14:73237497-73274640</u>  | 108.20 TPM<br>Nerve—Tibial                      | in | ENSG0000 | 0100767.15 |
| 27 | KIF23   | Kinesin family member 23                         | hg38<br><u>chr15:69415994-69448427</u>  | 37.33 TPM<br>Cells-EBV-transformed lymphocytes  | in | ENSG0000 | 0137807.13 |
| 28 | DLGAP5  | DLG associated protein 5                         | hg38<br><u>chr14:55148112-55191678</u>  | 65.98 TPM<br>Cells-EBV-transformed lymphocytes  | in | ENSG0000 | 0126787.12 |
| 29 | SPC25   | SPC25 component of NDC80 kinetochore complex     | hg38<br><u>chr2:168834132-168913371</u> | 26.91 TPM<br>Cells-EBV-transformed lymphocyte   | in | ENSG0000 | 0152253.8  |
| 30 | LYPD6B  | LY6/PLAUR domain containing 6B                   | hg38<br><u>chr2:149038107-149215262</u> | 50.51 TPM<br>Skin- Not Exposed (Suprapubic)     | in | ENSG0000 | 0150556.16 |
| 31 | NEK2    | NIMA related kinase 2                            | hg38<br><u>chr1:211658657-211675630</u> | 52.47 TPM<br>Testis                             | in | ENSG0000 | 0117650.12 |
| 32 | MELK    | Maternal embryonic leucine zipper kinase         | hg38<br><u>chr9:36572862-36677683</u>   | 46.03 TPM<br>Cells-EBV-transformed lymphocytes  | in | ENSG0000 | 0165304.7  |
| 33 | DEPDC1B | DEP domain containing 1B                         | hg38<br><u>chr5:60596912-60700190</u>   | 26.82 TPM<br>Cells-EBV-transformed lymphocytes  | in | ENSG0000 | 0035499.12 |
| 34 | NETO2   | Neuropilin and tolloid like 2                    | hg38<br><u>chr16:47077703-47143997</u>  | 13.40 TPM<br>Cells-EBV-transformed lymphocytes  | in | ENSG0000 | 0171208.9  |
| 35 | UBE2C   | Ubiquitin conjugating enzyme E2 C                | hg38<br><u>chr20:45812576-45816957</u>  | 144.45 TPM<br>Cells-EBV-transformed lymphocytes | in | ENSG0000 | 0175063.16 |

|    |            |                                                        |                                                  |            |    |                    |                                   |
|----|------------|--------------------------------------------------------|--------------------------------------------------|------------|----|--------------------|-----------------------------------|
| 36 | FAM13A-AS1 | FAM13A antisense RNA 1                                 | hg38<br><a href="#">chr4:88709789-88730103</a>   | 30.09 TPM  | in | ENSG00000248019.2  | Brain-Cerebellum                  |
| 37 | ATP8A1     | ATPase phospholipid transporting 8A1                   | hg38<br><a href="#">chr4:42408373-42657105</a>   | 64.08 TPM  | in | ENSG00000124406.16 | Thyroid                           |
| 38 | SERPINB9   | Serpin family B member 9                               | hg38<br><a href="#">chr6:2887266-2903280</a>     | 159.70 TPM | in | ENSG00000170542.5  | Cells-EBV-transformed lymphocytes |
| 39 | BUB1       | BUB1 mitotic checkpoint serine/threonine kinase        | hg38<br><a href="#">chr2:110637698-110678114</a> | 88.96 TPM  | in | ENSG00000169679.14 | Cells-EBV-transformed lymphocytes |
| 40 | RRM2       |                                                        | hg38<br><a href="#">chr2:10122328-10131419</a>   | 174.50 TPM | in | ENSG00000171848.13 | Cells-EBV-transformed lymphocytes |
| 41 | DNASE1L3   | Deoxyribonuclease 1 like 3                             | hg38<br><a href="#">chr3:58192257-58214697</a>   | 106.00 TPM | in | ENSG00000163687.13 | Spleen                            |
| 42 | CDCA2      | Cell division cycle associated 2                       | hg38<br><a href="#">chr8:25458997-25507920</a>   | 36.57 TPM  | in | ENSG00000184661.13 | Testis                            |
| 43 | ABCA11P    | ATP binding cassette subfamily A member 11, pseudogene | hg38 <a href="#">chr4:425435-427882</a>          | 9.73 TPM   | in | ENSG00000251595.7  | Pituitary                         |
| 44 | NDC80      | NDC80 kinetochore complex component                    | hg38<br><a href="#">chr18:2571511-2616635</a>    | 36.81 TPM  | in | ENSG00000080986.12 | Cells-EBV-transformed lymphocytes |
| 45 | CCNB2      | Cyclin B2                                              | hg38<br><a href="#">chr15:59105078-59125045</a>  | 79.42 TPM  | in | ENSG00000157456.7  | Testis                            |
| 46 | TK1        | Thymidine kinase 1                                     | hg38<br><a href="#">chr17:78174075-78187233</a>  | 118.55 TPM | in | ENSG00000167900.11 | Cells-EBV-transformed lymphocytes |
| 47 | UBE2T      | Ubiquitin conjugating enzyme E2 T                      | hg38<br><a href="#">chr1:202331657-202341980</a> | 92.91 TPM  | in | ENSG00000077152.9  | Cells-EBV-transformed lymphocytes |
| 48 | CYP3A5     | cytochrome P450 family 3 subfamily A member 5          | hg38<br><a href="#">chr7:99648194-</a>           | 155.90 TPM | in | ENSG00000106258.13 | Liver                             |

|    |        |                                                       |                                                          |         |     |    |                                               |            |
|----|--------|-------------------------------------------------------|----------------------------------------------------------|---------|-----|----|-----------------------------------------------|------------|
| 49 | UPP1   | Uridine phosphorylase 1                               | <u>99679998</u><br>hg38<br><u>chr7:48088628-48108733</u> | 142.00  | TPM | in | ENSG0000<br>Whole Blood                       | 0183696.13 |
| 50 | BIRC5  | Baculoviral IAP repeat containing 5                   | hg38<br><u>chr17:78214186-78225636</u>                   | 58.58   | TPM | in | ENSG0000<br>Cells-EBV-transformed lymphocytes | 0089685.14 |
| 51 | FOS    | Fos proto-oncogene, AP-1 transcription factor subunit | hg38<br><u>chr14:75278774-75282230</u>                   | 1112.00 | TPM | in | ENSG0000<br>Fallopian Tube                    | 0170345.9  |
| 52 | ISG20  | Interferon stimulated exonuclease gene 20             | hg38<br><u>chr15:88636153-88656483</u>                   | 98.66   | TPM | in | ENSG0000<br>Cells-EBV-transformed lymphocytes | 0172183.14 |
| 53 | SLC7A5 | Solute carrier family 7 member 5                      | hg38<br><u>chr16:87830023-87869488</u>                   | 150.70  | TPM | in | ENSG0000<br>Testis                            | 0103257.8  |
| 54 | KIF20A | Kinesin family member 20A                             | hg38<br><u>chr5:138178998-138187647</u>                  | 39.53   | TPM | in | ENSG0000<br>Cells-EBV-transformed lymphocytes | 0112984.11 |
| 55 | TTC39A | Tetratricopeptide repeat domain 39A                   | hg38<br><u>chr1:51287258-51345116</u>                    | 35.54   | TPM | in | ENSG0000<br>Testis                            | 0085831.15 |
| 56 | CDCA3  | Cell division cycle associated 3                      | hg38<br><u>chr12:6844793-6852066</u>                     | 29.41   | TPM | in | ENSG0000<br>Testis                            | 0111665.11 |
| 57 | LAMP3  | Lysosomal associated membrane protein 3               | hg38<br><u>chr3:183122213-183163839</u>                  | 105.05  | TPM | in | ENSG0000<br>Cells-EBV-transformed lymphocytes | 0078081.7  |

---
